# Supplementary material
Source: PubMed Central journal article supplement (PMC5330260)
Supplement: NIHMS847375-supplement-01.pdf [file NIHMS847375-supplement-01.pdf]

Figure S1 – Optimization of RGS4 and RGS17 Vector Pairs. A) Buffer subtracted  $AlF_4$  response for each RGS4:  $G\alpha_{i1}$  vector combination. B) Magnitude and C) fold response for each vector combination over buffer treated samples based on AUC analysis of the combined data. Conditions marked with (#) denote the four chosen as the optimal pairs. Panels D-F represent the same analysis for RGS17:  $G\alpha_{i1}$  vector combinations.

Figure S2 – Differential RGS Response, RGS:  $G\alpha_{i1}$  Interactions. Buffer subtracted  $\text{AlF}_4$  response over time for each of the 13 RGS:  $G\alpha_{i1}$  combinations tested. These data correspond to the area under the curve analysis shown in Figure 3A. Data are the background subtracted results of  $n=3$  in at least duplicate,  $\pm$  SEM.
